# Supplementary material for: PBPK Modeling and Simulation of Antibiotics Amikacin, Gentamicin, Tobramycin, and Vancomycin Used in Hospital Practice
Source: MDPI journal article supplement (doi:10.3390/life11111130), 2021-10-23
Supplement: s1 [file s1]

---

## SUPPLEMENTARY MATERIALS

### PBPK modeling and simulation of antibiotics amikacin, gentamicin, tobramycin, and vancomycin used in hospital practice

Abigail Ferreira <sup>1,3</sup>, Helena Martins <sup>2</sup>, José Carlos Oliveira <sup>2</sup>, Rui Lapa <sup>3</sup> and Nuno Vale <sup>1,4,\*</sup>

<sup>1</sup> OncoPharma Research Group, Center for Health Technology and Services Research (CINTESIS), Rua Doutor Plácido da Costa, 4200-450 Porto, Portugal; [abigail.ferreira@fc.up.pt](mailto:abigail.ferreira@fc.up.pt)

<sup>2</sup> LAQV/REQUIMTE, Laboratory of Applied Chemistry, Department of Chemical Sciences, Faculty of Pharmacy, University of Porto, Rua de Jorge Viterbo Ferreira, 228, 4050-313 Porto, Portugal; [laparuas@ff.up.pt](mailto:laparuas@ff.up.pt)

<sup>3</sup> Department of Pathology, Clinical Chemistry Service, Centro Hospitalar Universitário do Porto (CHUP), Largo Professor Abel Salazar, 4099-001 Porto, Portugal; [helena.martins.sqc@chporto.min-saude.pt](mailto:helena.martins.sqc@chporto.min-saude.pt) (H.M.); [director.sqc@chporto.min-saude.pt](mailto:director.sqc@chporto.min-saude.pt) (J.C.O.)

<sup>4</sup> Department of Community Medicine, Health Information and Decision (MEDCIDS), Faculty of Medicine, University of Porto, Alameda Professor Hernâni Monteiro, 4200-319 Porto, Portugal

\* Correspondence: [nunovale@med.up.pt](mailto:nunovale@med.up.pt); Tel.: +351-220426537

**Table S1.** Demographic information and clinical data of the study population.

Blood samples were typically collected prior to the following antibiotic administration to determine  $C_{min}$  (at most 30 minutes before infusion) and 1 h (aminoglycosides) or 3 h (vancomycin) after the beginning of an infusion to determine  $C_{max}$ . When an occasional sample was collected, the measured concentration is presented with the indication of the time of blood sample collection. In some cases, it was not possible to determine the antibiotic concentration and a calculated range is presented (estimation of the software used in the clinical setting, PKS, ABBOTTBASE® Pharmacokinetic Systems, version 1.10, Abbott Laboratories, Texas, USA). The considered normal range of creatinine concentration in plasma is 0.7 - 1.2 mg/dL for male patients and 0.5 - 0.9 mg/dL for female patients. Clearance was calculated from creatinine concentration using the Cockcroft-Gault formula [1]:  $CL = ((140 - \text{age}) \times \text{weight}) / (72 \times [\text{creatinine}])$ ; multiply by 0.85 for female individuals; CL in mL/min, weight in kg, [creatinine] in mg/dL.

| Recommended posology |      |             |             |             |        |                            |          |                         |                         |              |          |
|----------------------|------|-------------|-------------|-------------|--------|----------------------------|----------|-------------------------|-------------------------|--------------|----------|
| #ID                  | Sex  | Age (years) | Weight (kg) | Height (cm) | Date   | Dose (mg)                  | Interval | C <sub>min</sub> (mg/L) | C <sub>max</sub> (mg/L) | [Cr] (mg/dL) | CL (L/h) |
| AMIKACIN             |      |             |             |             |        |                            |          |                         |                         |              |          |
| 25                   | Male | 67          | 72.5        | 163         | Day 1  | 900                        | 24 h     | 2.1                     | 60.2                    | 0.66         | 6.91     |
|                      |      |             |             |             | Day 3  | 750                        | 24 h     |                         |                         |              |          |
|                      |      |             |             |             | Day 6  | 750                        | 24 h     |                         |                         |              |          |
|                      |      |             |             |             | Day 7  | 800                        | 24 h     |                         |                         |              |          |
|                      |      |             |             |             |        |                            |          |                         |                         |              |          |
| 26                   | Male | 79          | 60          | 168         | Day 1  | 450                        | 12 h     | 16.4                    | 44.0                    | 1.10         | 2.77     |
|                      |      |             |             |             | Day 4  | 450                        | 12 h     |                         |                         |              |          |
|                      |      |             |             |             | Day 5  | Susp 1 dose > 450 mg q24h  | 24 h     |                         |                         |              |          |
|                      |      |             |             |             | Day 6  | 450                        | 24 h     |                         |                         |              |          |
|                      |      |             |             |             | Day 11 | 450                        | 24 h     |                         |                         |              |          |
| 28                   | Fem  | 87          | 50          | 167         | Day 1  |                            |          | 4.3                     | 56.0                    | 0.79         | 2.38     |
|                      |      |             |             |             | Day 7  | 750                        | 24 h     |                         |                         |              |          |
|                      |      |             |             |             | Day 9  | 500                        | 24 h     |                         |                         |              |          |
|                      |      |             |             |             | Day 14 | 500                        | 24 h     |                         |                         |              |          |
|                      |      |             |             |             | Day 19 | 500                        | 24 h     |                         |                         |              |          |
| 29                   | Male | 14          | 53.8        | 168         | Day 1  | 1500                       | 24 h     | 0.5                     | 87.8                    | 0.50         | 11.30    |
|                      |      |             |             |             | Day 4  | 1100                       | 24 h     |                         |                         |              |          |
|                      |      |             |             |             | Day 8  | 1100                       | 24 h     |                         |                         |              |          |
| 32                   | Male | 77          | 70          | 170         | Day 1  | 500                        | 24 h     | 2.4                     | 19.7                    | 1.09         | 3.37     |
|                      |      |             |             |             | Day 2  | 500                        | 24 h     |                         |                         |              |          |
|                      |      |             |             |             | Day 3  | 500                        | 24 h     |                         |                         |              |          |
|                      |      |             |             |             | Day 4  | 800                        | 24 h     |                         |                         |              |          |
|                      |      |             |             |             | Day 5  | 800                        | 24 h     |                         |                         |              |          |
|                      |      |             |             |             | Day 6  | 700                        | 24 h     |                         |                         |              |          |
|                      |      |             |             |             | Day 9  | 700                        | 24 h     |                         |                         |              |          |
|                      |      |             |             |             | Day 10 | 700                        | 24 h     |                         |                         |              |          |
|                      |      |             |             |             | Day 11 | Susp 1 dose > 800 mg q48h  | 7.6      |                         |                         |              |          |
| 36                   | Male | 18          | 53.6        | 168         | Day 1  | 500                        | 8 h      | 2.5                     | calc 27-28              | 0.62         | 8.79     |
|                      |      |             |             |             | Day 5  | Susp 3 doses > 850 mg q24h | 24 h     |                         |                         |              |          |
|                      |      |             |             |             | Day 9  | 850                        | 24 h     |                         |                         |              |          |
|                      |      |             |             |             | Day 13 | 850                        | 24 h     |                         |                         |              |          |
| 37                   | Male | 58          | 92.5        | 180         | Day 1  |                            |          | 2.7                     | 24.5                    | 1.11         | 6.16     |
|                      |      |             |             |             | Day 3  | 500                        | 24 h     |                         |                         |              |          |
|                      |      |             |             |             | Day 5  | 650                        | 24 h     |                         |                         |              |          |
|                      |      |             |             |             | Day 8  | 650                        | 24 h     |                         |                         |              |          |
|                      |      |             |             |             | Day 9  | 800                        | 24 h     |                         |                         |              |          |
|                      |      |             |             |             | Day 10 | 800                        | 24 h     |                         |                         |              |          |
|                      |      |             |             |             | Day 12 | 800                        | 24 h     |                         |                         |              |          |
|                      |      |             |             |             | Day 15 | 800                        | 24 h     |                         |                         |              |          |
|                      |      |             |             |             | Day 17 | 800                        | 24 h     |                         |                         |              |          |

| Recommended posology |     |             |             |             |        |                           |          |                         |                         |              |                           |      |          |                    |      |       |
|----------------------|-----|-------------|-------------|-------------|--------|---------------------------|----------|-------------------------|-------------------------|--------------|---------------------------|------|----------|--------------------|------|-------|
| #ID                  | Sex | Age (years) | Weight (kg) | Height (cm) | Date   | Dose (mg)                 | Interval | C <sub>min</sub> (mg/L) | C <sub>max</sub> (mg/L) | [Cr] (mg/dL) | CL (L/h)                  |      |          |                    |      |       |
|                      |     |             |             |             | Day 18 | 800                       | 24 h     | 4.2                     | 39.2                    |              |                           |      |          |                    |      |       |
|                      |     |             |             |             | Day 19 | 800                       | 24 h     |                         |                         | 1.38         | 4.95                      |      |          |                    |      |       |
|                      |     |             |             |             | Day 20 | 800                       | 24 h     |                         |                         | 1.03         | 6.63                      |      |          |                    |      |       |
|                      |     |             |             |             | Day 22 | 800                       | 24 h     |                         |                         | 1.23         | 5.56                      |      |          |                    |      |       |
|                      |     |             |             |             | Day 23 | 800                       | 24 h     | 5.5                     | 35.4                    | 1.09         | 6.27                      |      |          |                    |      |       |
|                      |     |             |             |             | Day 25 | 800                       | 24 h     |                         |                         | 1.27         | 5.38                      |      |          |                    |      |       |
|                      |     |             |             |             | Day 26 | 650                       | 24 h     | 5.8                     | 38.5                    | 1.23         | 5.56                      |      |          |                    |      |       |
|                      |     |             |             |             | Day 29 | 650                       | 24 h     |                         |                         | 1.30         | 5.26                      |      |          |                    |      |       |
|                      |     |             |             |             | Day 30 | Susp 1 dose > 800 mg q48h |          | 5.7                     | 25.3                    | 1.48         | 4.62                      |      |          |                    |      |       |
|                      |     |             |             |             | Day 31 |                           |          |                         |                         | 1.45         | 4.71                      |      |          |                    |      |       |
|                      |     |             |             |             | Day 33 | 800                       | 48 h     |                         |                         | 1.47         | 4.65                      |      |          |                    |      |       |
|                      |     |             |             |             | Day 36 | 750                       | 48 h     | 1.8                     | 33.3                    | 1.36         | 5.02                      |      |          |                    |      |       |
|                      |     |             |             |             | Day 37 | 750                       | 48 h     |                         |                         | 1.52         | 4.50                      |      |          |                    |      |       |
|                      |     |             |             |             | Day 38 | 750                       | 48 h     |                         |                         | 1.58         | 4.32                      |      |          |                    |      |       |
|                      |     |             |             |             | Day 40 | 750                       | 48 h     | 2.0                     | 24.7                    | 1.43         | 4.78                      |      |          |                    |      |       |
|                      |     |             |             |             | Day 43 | 750                       | 48 h     |                         |                         | 1.37         | 4.99                      |      |          |                    |      |       |
|                      |     |             |             |             | Day 45 | 750                       | 48 h     |                         |                         | 1.36         | 5.02                      |      |          |                    |      |       |
|                      |     |             |             |             | Day 46 | 750                       | 48 h     | 1.9                     | 28.8                    |              |                           |      |          |                    |      |       |
|                      |     |             |             |             | 38     | Male                      | 56       | 75                      | 170                     | Day 1        | 800                       | 24 h |          |                    | 0.74 | 7.09  |
|                      |     |             |             |             |        |                           |          |                         |                         | Day 2        | 800                       | 24 h |          |                    | 0.82 | 6.40  |
|                      |     |             |             |             |        |                           |          |                         |                         | Day 3        | 800                       | 24 h |          |                    | 0.75 | 7.00  |
|                      |     |             |             |             |        |                           |          |                         |                         | Day 4        | 800                       | 24 h |          |                    | 0.58 | 9.05  |
|                      |     |             |             |             |        |                           |          |                         |                         | Day 5        | 800                       | 24 h |          |                    | 0.55 | 9.55  |
|                      |     |             |             |             |        |                           |          |                         |                         | Day 6        | 800                       | 24 h |          |                    | 0.54 | 9.72  |
|                      |     |             |             |             |        |                           |          |                         |                         | Day 7        | 800                       | 24 h | 4.7      | 34.4               | 0.61 | 8.61  |
|                      |     |             |             |             |        |                           |          |                         |                         | Day 8        | 800                       | 24 h |          |                    | 0.51 | 10.29 |
|                      |     |             |             |             |        |                           |          |                         |                         | Day 9        | 800                       | 24 h |          |                    | 0.63 | 8.33  |
|                      |     |             |             |             |        |                           |          |                         |                         | Day 10       | 800                       | 24 h | calc 3-4 | calc 31-33         | 0.60 | 8.75  |
|                      |     |             |             |             |        |                           |          |                         |                         | Day 13       | 400                       | 12 h |          |                    | 0.50 | 10.50 |
|                      |     |             |             |             |        |                           |          |                         |                         | Day 18       | 650                       | 24 h | 4        | 23                 | 0.50 | 10.50 |
|                      |     |             |             |             |        |                           |          |                         |                         | Day 19       | 650                       | 24 h |          |                    | 0.47 | 11.17 |
|                      |     |             |             |             |        |                           |          |                         |                         | Day 20       | 550                       | 24 h | 5.6      | (occas 1.5 h) 39.7 | 0.53 | 9.91  |
|                      |     |             |             |             |        |                           |          |                         |                         | Day 21       | 550                       | 24 h |          |                    | 0.54 | 9.72  |
|                      |     |             |             |             |        |                           |          |                         |                         | Day 22       | 550                       | 24 h |          |                    | 0.64 | 8.20  |
|                      |     |             |             |             |        |                           |          |                         |                         | Day 23       | 550                       | 24 h |          |                    | 0.83 | 6.33  |
|                      |     |             |             |             |        |                           |          |                         |                         | Day 24       | 550                       | 24 h |          |                    | 0.77 | 6.82  |
|                      |     |             |             |             |        |                           |          |                         |                         | Day 25       | 550                       | 24 h |          |                    | 0.59 | 8.90  |
|                      |     |             |             |             |        |                           |          |                         |                         | Day 26       | Susp 1 dose > 700 mg q48h |      | 5.2      | 28.7               | 0.69 | 7.61  |
|                      |     |             |             |             |        |                           |          |                         |                         | Day 27       | 700                       | 48 h |          |                    | 0.88 | 5.97  |
|                      |     |             |             |             |        |                           |          |                         |                         | Day 28       | 700                       | 48 h |          |                    | 0.66 | 7.95  |
|                      |     |             |             |             |        |                           |          |                         |                         | Day 29       | 700                       | 48 h |          |                    | 0.70 | 7.50  |
|                      |     |             |             |             |        |                           |          |                         |                         | Day 30       | 700                       | 48 h |          |                    | 0.75 | 7.00  |
|                      |     |             |             |             |        |                           |          |                         |                         | Day 31       | 700                       | 48 h |          |                    | 0.90 | 5.83  |
|                      |     |             |             |             |        |                           |          |                         |                         | Day 32       | 700                       | 48 h | 2.2      | calc 31-33         | 0.86 | 6.10  |
|                      |     |             |             |             |        |                           |          |                         |                         | Day 33       | 700                       | 48 h |          |                    | 0.92 | 5.71  |
|                      |     |             |             |             |        |                           |          |                         |                         | Day 34       | 700                       | 48 h | 2.0      | 34.5               | 0.76 | 6.91  |
|                      |     |             |             |             |        |                           |          |                         |                         | Day 35       | 700                       | 48 h |          |                    | 0.70 | 7.50  |
|                      |     |             |             |             |        |                           |          |                         |                         | Day 36       | 700                       | 48 h |          |                    | 0.71 | 7.39  |

| Recommended posology |      |             |             |             |            |                            |          |                         |                         |              |          |
|----------------------|------|-------------|-------------|-------------|------------|----------------------------|----------|-------------------------|-------------------------|--------------|----------|
| #ID                  | Sex  | Age (years) | Weight (kg) | Height (cm) | Date       | Dose (mg)                  | Interval | C <sub>min</sub> (mg/L) | C <sub>max</sub> (mg/L) | [Cr] (mg/dL) | CL (L/h) |
|                      |      |             |             |             | Day 37     | 700                        | 48 h     |                         |                         | 0.59         | 8.90     |
|                      |      |             |             |             | Day 38     | 700                        | 48 h     |                         |                         | 0.74         | 7.09     |
|                      |      |             |             |             | Day 39     | 700                        | 48 h     | 1.3                     | (occas 1.3 h) 37.2      | 0.65         | 8.08     |
|                      |      |             |             |             | GENTAMICIN |                            |          |                         |                         |              |          |
| 7                    | Male | 49          | 67          | 175         | Day 1      |                            |          |                         |                         | 0.67         | 7.58     |
|                      |      |             |             |             | Day 3      | 180                        | 12 h     |                         |                         | 0.63         | 8.06     |
|                      |      |             |             |             | Day 4      | 180                        | 12 h     | 0.3                     | calc 9.5 - 10.5         | 0.63         | 8.06     |
|                      |      |             |             |             | Day 6      | 220                        | 12 h     | 0.3                     | 6.7                     | 0.52         | 9.77     |
|                      |      |             |             |             | Day 10     | 220                        | 12 h     | 0.6                     | (occas 1.5 h) 9.1       | 0.70         | 7.26     |
|                      |      |             |             |             | Day 12     | 220                        | 12 h     | 0.5                     | 8.9                     | 0.69         | 7.36     |
|                      |      |             |             |             |            |                            |          |                         |                         |              |          |
| 18                   | Fem  | 72          | 70          | 160         | Day 1      | 210                        | 24 h     |                         |                         |              |          |
|                      |      |             |             |             | Day 2      | 210                        | 24 h     |                         |                         | 1.09         | 3.09     |
|                      |      |             |             |             | Day 4      | 120                        | 24 h     | 0.5                     | 13.7                    |              |          |
|                      |      |             |             |             | Day 5      | 120                        | 24 h     |                         |                         | 1.08         | 3.12     |
|                      |      |             |             |             | Day 7      | 120                        | 24 h     |                         |                         | 1.16         | 2.91     |
|                      |      |             |             |             | Day 8      | 100                        | 24 h     | 0.4                     | 7.1                     | 1.30         | 2.59     |
|                      |      |             |             |             |            |                            |          |                         |                         |              |          |
| 19                   | Male | 78          | 47          | 170         | Day 1      |                            |          |                         |                         | 0.61         | 3.98     |
|                      |      |             |             |             | Day 2      | 240                        | 24 h     |                         |                         |              |          |
|                      |      |             |             |             | Day 3      | 240                        | 24 h     |                         |                         | 0.68         | 3.57     |
|                      |      |             |             |             | Day 4      | 240                        | 24 h     |                         |                         |              |          |
|                      |      |             |             |             | Day 5      | 240                        | 24 h     |                         |                         | 0.65         | 3.74     |
|                      |      |             |             |             | Day 6      | 350                        | 24 h     | 0.8                     | (occas 1.5 h) 8.6       | 0.62         | 3.92     |
|                      |      |             |             |             | Day 7      | 350                        | 24 h     | 1.1                     | 16.9                    | 0.81         | 3.00     |
|                      |      |             |             |             | Day 9      | 380                        | 24 h     | 1.8                     | 18.3                    | 0.84         | 2.89     |
|                      |      |             |             |             |            |                            |          |                         |                         |              |          |
| 22                   | Fem  | 88          | 75          | 155         | Day 1      | 300                        | 24 h     |                         |                         | 0.68         | 4.06     |
|                      |      |             |             |             | Day 5      | Susp 2 doses > 160 mg q48h |          | 4.2                     | 19.17                   | 0.81         | 3.41     |
|                      |      |             |             |             | Day 8      | 160                        | 48 h     |                         |                         | 0.90         | 3.07     |
|                      |      |             |             |             | Day 12     | Susp 3 doses > 170 mg q72h |          | 1.7                     | 9.9                     | 1.42         | 1.95     |
|                      |      |             |             |             |            |                            |          |                         |                         |              |          |
| 23                   | Fem  | 60          | 65.3        | 165         | Day 1      | 62                         | 8 h      |                         | (occas 5 h) 1.7         | 0.48         | 7.59     |
|                      |      |             |             |             | Day 2      | 150                        | 12 h     |                         |                         | 0.64         | 5.69     |
|                      |      |             |             |             | Day 3      | 150                        | 12 h     |                         | (occas 5 h) 2.1         | 0.51         | 7.14     |
|                      |      |             |             |             | Day 6      | 150                        | 12 h     |                         |                         | 0.77         | 4.73     |
|                      |      |             |             |             | Day 7      | 170                        | 12 h     | 0.8                     | 5.8                     | 0.58         | 6.28     |
|                      |      |             |             |             | Day 8      | 170                        | 12 h     |                         |                         | 0.66         | 5.52     |
|                      |      |             |             |             | Day 9      | 170                        | 12 h     |                         |                         | 0.60         | 6.07     |
|                      |      |             |             |             | Day 10     | Susp 2 doses > 200 mg q24h |          | 1.3                     | 6.8 <sup>a</sup>        | 0.58         | 6.28     |
|                      |      |             |             |             | Day 11     | 200                        | 24 h     |                         |                         |              |          |
|                      |      |             |             |             | Day 13     | 200                        | 24 h     |                         |                         | 0.71         | 5.13     |
|                      |      |             |             |             | Day 14     | 150                        | 24 h     | 0.8                     | 10.6                    | 0.70         | 5.21     |
|                      |      |             |             |             | Day 16     | 150                        | 24 h     |                         |                         | 0.82         | 4.44     |
|                      |      |             |             |             | Day 20     | Susp 1 dose > 120 mg q48h  |          | 1.3                     | 9.9                     | 1.23         | 2.96     |
|                      |      |             |             |             | Day 22     | 120                        | 48 h     |                         |                         | 0.90         | 4.05     |
|                      |      |             |             |             | Day 24     | 150                        | 48 h     | 0.2                     | 5.1                     | 0.73         | 4.99     |
|                      |      |             |             |             | Day 26     | 100                        | 24 h     | 0.1                     | 5.1                     |              |          |
|                      |      |             |             |             |            |                            |          |                         |                         |              |          |
| 24                   | Fem  | 50          | 65          | 157         | Day 1      |                            |          |                         |                         | 0.96         | 4.32     |
|                      |      |             |             |             | Day 4      | 100                        | 8 h      |                         |                         | 0.84         | 4.93     |
|                      |      |             |             |             | Day 8      | Susp 1 dose > 130 mg q24h  |          | 3.8                     | 10.0                    | 0.91         | 4.55     |

| Recommended posology |      |             |             |             |        |                            |          |                         |                         |              |          |
|----------------------|------|-------------|-------------|-------------|--------|----------------------------|----------|-------------------------|-------------------------|--------------|----------|
| #ID                  | Sex  | Age (years) | Weight (kg) | Height (cm) | Date   | Dose (mg)                  | Interval | C <sub>min</sub> (mg/L) | C <sub>max</sub> (mg/L) | [Cr] (mg/dL) | CL (L/h) |
| 27                   | Male | 20          | 70          | 175         | Day 9  | 130                        | 24 h     |                         |                         |              |          |
|                      |      |             |             |             | Day 11 | 140                        | 24 h     | 0.8                     | 7.5                     | 0.95         | 4.36     |
|                      |      |             |             |             | Day 15 | 120                        | 24 h     | 0.6                     | 12.2                    | 1.12         | 3.70     |
|                      |      |             |             |             | Day 1  | 70                         | 8 h      |                         |                         | 0.87         | 8.05     |
|                      |      |             |             |             | Day 2  | 70                         | 8 h      |                         |                         | 0.71         | 9.86     |
|                      |      |             |             |             | Day 3  | 70                         | 8 h      |                         |                         | 0.75         | 9.33     |
|                      |      |             |             |             | Day 4  | 70                         | 8 h      |                         |                         | 0.76         | 9.21     |
|                      |      |             |             |             | Day 5  | 160                        | 12 h     | 0.3                     | 3.4                     | 0.86         | 8.14     |
|                      |      |             |             |             | Day 8  | 160                        | 12 h     | 0.4                     | 7.6                     | 0.75         | 9.33     |
|                      |      |             |             |             | Day 10 | 160                        | 12 h     | 0.4                     | 8.2                     | 0.88         | 7.95     |
| 33                   | Male | 75          | 53          | 170         | Day 12 | 160                        | 12 h     | 0.3                     | 7.8                     | 0.78         | 8.97     |
|                      |      |             |             |             | Day 13 | 160                        | 12 h     |                         |                         | 0.70         | 10.00    |
|                      |      |             |             |             | Day 16 | 140                        | 12 h     | 0.6                     | 7.6                     | 0.86         | 8.14     |
|                      |      |             |             |             | Day 1  |                            |          |                         |                         | 1.49         | 1.93     |
|                      |      |             |             |             | Day 3  | 60                         | 8 h      |                         |                         | 0.90         | 3.19     |
| 34                   | Male | 69          | 83          | 180         | Day 6  | Susp 1 dose > 150 mg q24h  |          | 2.5                     | 5.3                     | 0.89         | 3.23     |
|                      |      |             |             |             | Day 11 | 100                        | 24 h     | 1.0                     | 13.2                    |              |          |
|                      |      |             |             |             | Day 13 | 100                        | 24 h     | 0.6                     | 8.2                     |              |          |
|                      |      |             |             |             | Day 1  |                            |          |                         |                         | 1.04         | 4.72     |
|                      |      |             |             |             | Day 4  | 240                        | 24 h     |                         |                         | 0.85         | 5.78     |
| 35                   | Male | 50          | 80          | 185         | Day 7  | 150                        | 24 h     | 0.2                     | (occas 1.5 h) 9.1       | 0.97         | 5.06     |
|                      |      |             |             |             | Day 11 | 150                        | 24 h     | 0.2                     | 4.6                     | 1.04         | 4.72     |
|                      |      |             |             |             | Day 12 | 170                        | 24 h     |                         |                         | 1.10         | 4.46     |
|                      |      |             |             |             | Day 14 | 160                        | 24 h     | 0.2                     | (occas 1.5 h) 5.6       | 1.04         | 4.72     |
|                      |      |             |             |             | Day 1  | 160                        | 24 h     |                         |                         |              |          |
| 50                   | Male | 73          | 80          | 170         | Day 6  | 190                        | 12 h     | 0.2                     | 6.6                     | 0.49         | 12.24    |
|                      |      |             |             |             | Day 8  | Susp 1 dose > 200 mg q24h  |          | 1.1                     | 10.4                    | 0.51         | 11.76    |
|                      |      |             |             |             | Day 15 | 200                        | 24 h     | 0.4                     | 9.4                     | 0.52         | 11.54    |
|                      |      |             |             |             | Day 21 | Susp 1 dose > 190 mg q24h  |          | 1.9                     | 12.8                    | 0.65         | 9.23     |
|                      |      |             |             |             | Day 23 | 190                        | 24 h     | 0.5                     | 10.8                    | 0.82         | 7.32     |
|                      |      |             |             |             | Day 27 | 190                        | 24 h     |                         |                         | 1.14         | 5.26     |
|                      |      |             |             |             | Day 28 | Susp 2 doses > 180 mg q48h |          | 2.2                     | 13.4                    | 1.47         | 4.08     |
|                      |      |             |             |             | Day 1  | 200                        | 24 h     |                         |                         |              |          |
| 62                   | Fem  | 7           | 15.5        | 108         | Day 7  | 150                        | 24 h     | 1.2                     | calc 10-12              | 1.14         | 3.92     |
|                      |      |             |             |             | Day 1  | 80                         | 24 h     |                         |                         | 0.68         | 2.15     |
| 63                   | Male | 62          | 85          | 180         | Day 3  | 80                         | 24 h     | (occas) 0.4             | calc 10-11              | 0.37         | 3.95     |
|                      |      |             |             |             | Day 1  | 433.5                      | 24 h     |                         |                         |              |          |
|                      |      |             |             |             | Day 8  | 433.5                      | 24 h     |                         |                         | 0.76         | 7.27     |
|                      |      |             |             |             | Day 9  | 433.5                      | 24 h     |                         |                         | 0.72         | 7.67     |
|                      |      |             |             |             | Day 10 | 500                        | 24 h     | 0.3                     | 19.5                    | 0.73         | 7.57     |
| -1                   | Male | 86          | 70          | 165         | Day 1  | 70                         | 12 h     | 1.2                     | 4.1                     | 1.89         | 1.67     |
| -2                   | Male | 33          | 70          | 170         | Day 1  | 80                         | 8 h      | 0.3                     | 3.1                     | 0.59         | 10.58    |
| -3                   | Male | 60          | 85          | 161         | Day 1  | 140                        | 8 h      | 2.9                     | 9.0                     | 0.85         | 6.67     |
| -4                   | Fem  | 78          | 44          | 160         | Day 1  | 130                        | 24 h     | 0.6                     | 5.2                     | 0.74         | 2.61     |
| -5                   | Male | 55          | 65          | 165         | Day 1  | 120                        | 8 h      | 0.2                     | 2.9                     | 0.29         | 15.88    |
| -6                   | Male | 34          | 71.4        | 165         | Day 1  | 240                        | 24 h     | 0.5                     | 5.9                     | 0.61         | 10.34    |
| -7                   | Fem  | 73          | 62          | 165         | Day 1  | 180                        | 24 h     | 1.3                     | 11.1                    | 1.00         | 2.94     |

| Recommended posology |      |             |             |             |        |                           |          |                         |                         |              |          |
|----------------------|------|-------------|-------------|-------------|--------|---------------------------|----------|-------------------------|-------------------------|--------------|----------|
| #ID                  | Sex  | Age (years) | Weight (kg) | Height (cm) | Date   | Dose (mg)                 | Interval | C <sub>min</sub> (mg/L) | C <sub>max</sub> (mg/L) | [Cr] (mg/dL) | CL (L/h) |
| -8                   | Male | 56          | 72          | 170         | Day 1  | 210                       | 24 h     | 4.8                     | 14.4                    | 1.00         | 5.04     |
| -9                   | Fem  | 51          | 63          | 160         | Day 1  | 180                       | 24 h     | 0.2                     | 6.6                     | 0.64         | 6.21     |
| TOBRAMYCIN           |      |             |             |             |        |                           |          |                         |                         |              |          |
| 30                   | Fem  | 13          | 40.8        | 146         | Day 1  | 400                       | 24 h     |                         |                         |              |          |
|                      |      |             |             |             | Day 3  | 400                       | 24 h     | 0.2                     | 18.8                    | 0.51         | 7.20     |
|                      |      |             |             |             | Day 5  | 500                       | 24 h     |                         |                         |              |          |
|                      |      |             |             |             | Day 7  | 450                       | 24 h     | ---                     | 33.7                    | 0.49         | 7.49     |
|                      |      |             |             |             | Day 12 | 450                       | 24 h     | 0.23                    | calc 24-26              | 0.46         | 7.98     |
| 31                   | Fem  | 13          | 27          | 140         | Day 1  | 270                       | 24 h     |                         |                         |              |          |
|                      |      |             |             |             | Day 3  | 270                       | 24 h     | 0.2                     | 25.9                    | 0.49         | 4.96     |
|                      |      |             |             |             | Day 7  | 270                       | 24 h     | ---                     | 26.4                    | 0.41         | 5.92     |
| 39                   | Fem  | 13          | 25.8        | 130         | Day 1  | 250                       | 24 h     |                         |                         |              |          |
|                      |      |             |             |             | Day 6  | 250                       | 24 h     | 0.2                     | 29.4                    | 0.48         | 4.84     |
|                      |      |             |             |             | Day 9  | 250                       | 24 h     | 0.1                     | 24.1                    | 0.60         | 3.87     |
|                      |      |             |             |             | Day 13 | 250                       | 24 h     | 0.1                     | ---                     | 0.55         | 4.22     |
| 40                   | Fem  | 19          | 29          | 155         | Day 1  | 300                       | 24 h     |                         |                         | 0.40         | 6.21     |
|                      |      |             |             |             | Day 2  | 300                       | 24 h     |                         |                         | 0.43         | 5.78     |
|                      |      |             |             |             | Day 3  | 300                       | 24 h     | (occas) 0.2             | calc 29-30              | 0.43         | 5.78     |
|                      |      |             |             |             | Day 6  | 300                       | 24 h     | (occas) 0.1             | calc 28-30              |              |          |
|                      |      |             |             |             | Day 8  | 300                       | 24 h     | (occas) 0.1             | calc 28-30              | 0.35         | 7.10     |
|                      |      |             |             |             | Day 12 | 350                       | 24 h     | ---                     | 17.0                    | 0.64         | 3.88     |
|                      |      |             |             |             | Day 16 | 350                       | 24 h     | ---                     | 16.3                    | 0.47         | 5.29     |
|                      |      |             |             |             | Day 19 | 300                       | 24 h     | ---                     | 34.8                    | 0.39         | 6.37     |
| 41                   | Male | 17          | 44.5        | 158         | Day 23 | 300                       | 24 h     | ---                     | 36.1                    | 0.54         | 4.60     |
|                      |      |             |             |             | Day 1  | 430                       | 24 h     |                         |                         |              |          |
|                      |      |             |             |             | Day 7  | 400                       | 24 h     | 0.2                     | 35                      | 0.52         | 8.77     |
|                      |      |             |             |             | Day 10 | 400                       | 24 h     | 0.2                     | calc 29-30              | 0.58         | 7.86     |
| VANCOMYCIN           |      |             |             |             |        |                           |          |                         |                         |              |          |
| 1                    | Fem  | 88          | 66          | 155         | Day 1  |                           |          |                         |                         | 0.95         | 2.56     |
|                      |      |             |             |             | Day 4  | 1000                      | 12 h     |                         |                         | 0.90         | 2.70     |
|                      |      |             |             |             | Day 6  | 750                       | 12 h     | 17.7                    | 31.0                    | 0.80         | 3.04     |
|                      |      |             |             |             | Day 8  | Susp 1 dose > 500 mg q12h |          | 23.4                    | 34.1                    | 0.81         | 3.00     |
|                      |      |             |             |             | Day 12 | Susp 1 dose > 750 mg q24h |          | 22.1                    | 27.3                    | 1.04         | 2.34     |
|                      |      |             |             |             | Day 20 | 500                       | 24 h     | 21.2                    | 34.7                    | 1.18         | 2.06     |
| 2                    | Fem  | 51          | 90          | 165         | Day 1  | 1000                      | 12 h     |                         |                         |              |          |
|                      |      |             |             |             | Day 3  | 800                       | 8 h      | 9.3                     | 19.8                    | 0.86         | 6.60     |
|                      |      |             |             |             | Day 4  |                           |          |                         |                         | 0.72         | 7.88     |
|                      |      |             |             |             | Day 6  | 800                       | 8 h      | 10.2                    | 19.1                    | 0.55         | 10.32    |
|                      |      |             |             |             | Day 9  |                           |          |                         |                         | 0.74         | 7.67     |
|                      |      |             |             |             | Day 10 |                           |          |                         |                         | 0.79         | 7.18     |
|                      |      |             |             |             | Day 11 | 950                       | 8 h      | 12.2                    | 21.2                    | 0.60         | 9.46     |
| 3                    | Fem  | 50          | 80          | 165         | Day 1  | 1000                      | 12 h     |                         |                         |              |          |
|                      |      |             |             |             | Day 8  | Susp 1 dose > 600 mg q12h |          | 26.0                    | 36.1                    | 1.05         | 5.46     |
|                      |      |             |             |             | Day 11 | 600                       | 12 h     | 15.6                    | 24.3                    | 1.12         | 5.12     |
|                      |      |             |             |             | Day 16 | 700                       | 12 h     | 12.5                    | 23.9                    | 0.90         | 6.38     |
| 4                    | Fem  | 61          | 71.5        | 160         | Day 19 | 600                       | 12 h     | 18.6                    | (occas 4 h) 29.7        | 1.02         | 5.63     |
|                      |      |             |             |             | Day 1  |                           |          |                         |                         | 0.72         | 5.28     |

| Recommended posology |      |             |             |             |        |                            |          |                         |                         |              |          |
|----------------------|------|-------------|-------------|-------------|--------|----------------------------|----------|-------------------------|-------------------------|--------------|----------|
| #ID                  | Sex  | Age (years) | Weight (kg) | Height (cm) | Date   | Dose (mg)                  | Interval | C <sub>min</sub> (mg/L) | C <sub>max</sub> (mg/L) | [Cr] (mg/dL) | CL (L/h) |
|                      |      |             |             |             | Day 2  | 1000                       | 12 h     |                         |                         | 0.63         | 6.04     |
|                      |      |             |             |             | Day 3  | 1000                       | 8 h      | 6.6                     | 16.1                    | 0.52         | 7.32     |
|                      |      |             |             |             | Day 4  |                            |          |                         |                         | 0.58         | 6.56     |
|                      |      |             |             |             | Day 5  |                            |          |                         |                         | 0.49         | 7.77     |
|                      |      |             |             |             | Day 6  | Susp 1 dose > 700 mg q8h   |          | 23.8                    | 36.2                    | 0.45         | 8.46     |
|                      |      |             |             |             | Day 9  | 700                        | 8 h      | 7.8                     | 18.9                    | 0.56         | 6.79     |
|                      |      |             |             |             | Day 1  | 1000                       | 12 h     |                         |                         |              |          |
| 5                    | Male | 58          | 87          | 185         | Day 3  |                            |          |                         |                         | 0.71         | 8.37     |
|                      |      |             |             |             | Day 4  | 1000                       | 8 h      | 7.3                     | 16.8                    | 0.72         | 8.26     |
|                      |      |             |             |             | Day 6  | Suspend administration     |          | 16.7                    | 23.7                    | 1.32         | 4.50     |
|                      |      |             |             |             | Day 1  | 1000                       | 12 h     |                         |                         |              |          |
| 6                    | Male | 62          | 71.9        | 172         | Day 2  |                            |          |                         |                         | 0.57         | 7.98     |
|                      |      |             |             |             | Day 3  | 650                        | 6 h      | 8.5                     | 17.1                    | 0.52         | 8.75     |
|                      |      |             |             |             | Day 5  | 700                        | 6 h      | 10.8                    | 15.2                    | 0.53         | 8.58     |
|                      |      |             |             |             | Day 1  |                            |          |                         |                         | 0.97         | 4.86     |
| 8                    | Male | 53          | 65          | 165         | Day 2  | 1000                       | 12 h     |                         |                         | 1.16         | 4.06     |
|                      |      |             |             |             | Day 5  | 850                        | 12 h     | calc 19-21              | (occas 4 h) 30.2        | 0.88         | 5.36     |
|                      |      |             |             |             | Day 6  | 850                        | 12 h     | 15.4                    | 27.3                    | 1.10         | 4.28     |
|                      |      |             |             |             | Day 7  | 850                        | 12 h     | 14.9                    | 28.4                    | 1.01         | 4.67     |
|                      |      |             |             |             | Day 9  |                            |          |                         |                         | 1.23         | 3.83     |
|                      |      |             |             |             | Day 13 | 600                        | 12 h     | 22.3                    | 34.0                    | 1.13         | 4.17     |
|                      |      |             |             |             | Day 1  | 1000                       | 12 h     |                         |                         |              |          |
| 9                    | Fem  | 66          | 140         | 163         | Day 3  | Susp 1 dose > 500 mg q12h  |          | 19.6                    | 28.3                    |              |          |
|                      |      |             |             |             | Day 7  | Susp 1 dose > 950 mg q24h  |          | 17.4                    | 22.9                    | 0.84         | 8.74     |
|                      |      |             |             |             | Day 13 | 800                        | 24 h     | 14.1                    | (occas 4 h) 23.7        |              |          |
|                      |      |             |             |             | Day 1  | 1000                       | 12 h     |                         |                         |              |          |
| 10                   | Male | 64          | 70          | 168         | Day 5  | 1000                       | 12 h     | 14.7                    | 28.0                    |              |          |
|                      |      |             |             |             | Day 7  | 850                        | 12 h     | 19.3                    | 21.1                    | 1.17         | 3.79     |
|                      |      |             |             |             | Day 12 | Susp 1 dose > 1000 mg q24h |          | 28.0                    | 33.4                    | 1.29         | 3.44     |
|                      |      |             |             |             | Day 15 | 500                        | 12 h     | 10.7                    | calc 27-29              | 1.35         | 3.28     |
|                      |      |             |             |             | Day 1  | 1000                       | 12 h     |                         |                         |              |          |
| 11                   | Fem  | 47          | 65          | 147         | Day 3  | Susp 1 dose > 750 mg q12h  |          | 17.3                    | 42.5                    | 1.10         | 3.89     |
|                      |      |             |             |             | Day 7  | 500                        | 8 h      | 10.5                    | 23.0                    |              |          |
|                      |      |             |             |             | Day 10 | 500                        | 8 h      | 13.1                    | 22.4                    | 0.70         | 6.12     |
|                      |      |             |             |             | Day 1  | 1000                       | 12 h     |                         |                         |              |          |
| 12                   | Fem  | 73          | 80          | 160         | Day 6  | Susp 1 dose > 650 mg q12h  |          | 26.4                    | 32.6                    | 0.53         | 7.16     |
|                      |      |             |             |             | Day 14 | 600                        | 12 h     | 19.1                    | 25.3                    |              |          |
|                      |      |             |             |             | Day 19 | 600                        | 12 h     | 15.5                    | 23.7                    |              |          |
|                      |      |             |             |             | Day 23 | 650                        | 12 h     | 16.5                    | ---                     |              |          |
|                      |      |             |             |             | Day 25 |                            |          |                         |                         | 0.47         | 8.08     |
|                      |      |             |             |             | Day 27 | 600                        | 12 h     | 20.9                    | 26.6                    | 0.45         | 8.44     |
|                      |      |             |             |             | Day 30 | 500                        | 12 h     | 22.4                    | 31.0                    | 0.41         | 9.26     |
|                      |      |             |             |             | Day 1  | 500                        | 6 h      |                         |                         |              |          |
| 14                   | Male | 59          | 85          | 174         | Day 3  | 700                        | 6 h      | 10.7                    | 11.8                    |              |          |
|                      |      |             |             |             | Day 4  |                            |          |                         |                         | 0.48         | 11.95    |
|                      |      |             |             |             | Day 5  | 800                        | 6 h      | 11.4                    | 14.8                    |              |          |
| 15                   | Fem  | 20          | 29          | 155         | Day 1  | 1000                       | 12 h     |                         |                         |              |          |

| Recommended posology |      |                |                |                |        |                           |          |                               |                         |                 |             |  |  |  |  |
|----------------------|------|----------------|----------------|----------------|--------|---------------------------|----------|-------------------------------|-------------------------|-----------------|-------------|--|--|--|--|
| #ID                  | Sex  | Age<br>(years) | Weight<br>(kg) | Height<br>(cm) | Date   | Dose (mg)                 | Interval | C <sub>min</sub><br>(mg/L)    | C <sub>max</sub> (mg/L) | [Cr]<br>(mg/dL) | CL<br>(L/h) |  |  |  |  |
| 16                   | Male | 80             | 60             | 160            | Day 3  | 500                       | 6 h      | 5.8                           | ---                     | 0.35            | 7.04        |  |  |  |  |
|                      |      |                |                |                | Day 5  | 300                       | 4 h      | 8.1                           | 15.0                    | 0.35            | 7.04        |  |  |  |  |
|                      |      |                |                |                | Day 8  | 300                       | 4 h      | 13.2                          | ---                     | 0.41            | 6.01        |  |  |  |  |
|                      |      |                |                |                | Day 11 | 300                       | 4 h      | 1.6 <sup>a</sup> ; calc 12-14 |                         | 0.40            | 6.16        |  |  |  |  |
|                      |      |                |                |                | Day 1  |                           |          |                               |                         | 4.78            | 0.63        |  |  |  |  |
|                      |      |                |                |                | Day 2  | 900                       | 12 h     |                               |                         |                 |             |  |  |  |  |
|                      |      |                |                |                | Day 3  |                           |          |                               |                         | 4.46            | 0.67        |  |  |  |  |
|                      |      |                |                |                | Day 4  |                           |          |                               |                         | 4.43            | 0.68        |  |  |  |  |
|                      |      |                |                |                | Day 5  | Suspend administration    | 22.3     | (occas 4 h) 39.6              | 3.99                    | 0.75            |             |  |  |  |  |
|                      |      |                |                |                | Day 6  |                           |          |                               | 2.98                    | 1.01            |             |  |  |  |  |
|                      |      |                |                |                | Day 7  |                           |          | 24.3                          | ---                     | 3.32            | 0.90        |  |  |  |  |
|                      |      |                |                |                | Day 8  | 500                       | 24 h     |                               | 2.83                    | 1.06            |             |  |  |  |  |
| 17                   | Fem  | 82             | 70             | 165            | Day 9  |                           |          |                               |                         | 2.24            | 1.34        |  |  |  |  |
|                      |      |                |                |                | Day 11 |                           |          |                               |                         | 1.78            | 1.69        |  |  |  |  |
|                      |      |                |                |                | Day 12 | 400                       | 24 h     | 21.4                          | 27.5                    | 1.95            | 1.54        |  |  |  |  |
|                      |      |                |                |                | Day 1  |                           |          |                               |                         | 0.93            | 3.09        |  |  |  |  |
|                      |      |                |                |                | Day 2  |                           |          |                               |                         | 0.80            | 3.59        |  |  |  |  |
|                      |      |                |                |                | Day 3  |                           |          |                               |                         | 0.89            | 3.23        |  |  |  |  |
|                      |      |                |                |                | Day 4  |                           |          |                               |                         | 0.78            | 3.69        |  |  |  |  |
|                      |      |                |                |                | Day 5  | 1000                      | 12 h     |                               |                         |                 |             |  |  |  |  |
|                      |      |                |                |                | Day 6  | 1000                      | 12 h     | 10.6                          | 23.0                    | 0.80            | 3.59        |  |  |  |  |
|                      |      |                |                |                | Day 9  |                           |          |                               |                         | 1.01            | 2.85        |  |  |  |  |
|                      |      |                |                |                | Day 11 | 900                       | 12 h     | 17.2                          | 32.5                    | 0.96            | 3.00        |  |  |  |  |
|                      |      |                |                |                | Day 13 | Susp 1 dose > 500 mg q12h | 27.2     | 36.5                          | 0.92                    | 3.13            |             |  |  |  |  |
| 21                   | Male | 53             | 70             | 170            | Day 1  | 1000                      | 12 h     |                               |                         | 0.50            | 10.15       |  |  |  |  |
|                      |      |                |                |                | Day 3  |                           |          |                               |                         | 0.40            | 12.69       |  |  |  |  |
|                      |      |                |                |                | Day 4  | 850                       | 6 h      | 4.8                           | 11.2                    | 0.40            | 12.69       |  |  |  |  |
|                      |      |                |                |                | Day 6  | 850                       | 6 h      | 9.6                           | 14.2                    | 0.54            | 9.40        |  |  |  |  |
|                      |      |                |                |                | Day 7  | 900                       | 6 h      | 9.5                           | 13.0                    | 0.40            | 12.69       |  |  |  |  |
|                      |      |                |                |                | Day 9  |                           |          |                               |                         | 0.68            | 7.46        |  |  |  |  |
|                      |      |                |                |                | Day 10 |                           |          |                               |                         | 0.78            | 6.51        |  |  |  |  |
|                      |      |                |                |                | Day 11 | 850                       | 6 h      | 18.5                          | 28.1                    | 0.68            | 7.46        |  |  |  |  |
|                      |      |                |                |                | Day 1  |                           |          |                               |                         | 3.32            | 0.59        |  |  |  |  |
|                      |      |                |                |                | Day 2  |                           |          |                               |                         | 2.85            | 0.69        |  |  |  |  |
|                      |      |                |                |                | Day 4  | 1000                      | 12 h     |                               |                         |                 |             |  |  |  |  |
|                      |      |                |                |                | Day 8  | Susp 3 days > 900 mg q24h | 44.5     | 60.1                          | 2.04                    | 0.96            |             |  |  |  |  |
| 42                   | Male | 93             | 50             | 170            | Day 13 | Suspend administration    | 31.4     | 45.3                          | 2.06                    | 0.95            |             |  |  |  |  |
|                      |      |                |                |                | Day 1  | 1000                      | 12 h     |                               |                         |                 |             |  |  |  |  |
|                      |      |                |                |                | Day 6  | 750                       | 6 h      | 7.9                           | 15.6                    | 0.61            | 6.66        |  |  |  |  |
|                      |      |                |                |                | Day 9  | 850                       | 6 h      | 12.9                          | 17.7                    | 0.69            | 5.89        |  |  |  |  |
|                      |      |                |                |                | Day 13 | Susp 2 doses > 650 mg q6h | 21.1     | 27.9                          | 0.74                    | 5.49            |             |  |  |  |  |
|                      |      |                |                |                | Day 22 | 1000                      | 12 h     |                               |                         |                 |             |  |  |  |  |
|                      |      |                |                |                | Day 26 | 600                       | 6 h      | 11.0                          | 21.3                    |                 |             |  |  |  |  |
|                      |      |                |                |                | Day 1  | 1000                      | 8 h      |                               |                         |                 |             |  |  |  |  |
|                      |      |                |                |                | Day 2  | 850                       | 6 h      | 10.7                          | 19.8                    |                 |             |  |  |  |  |
|                      |      |                |                |                | Day 4  | 800                       | 6 h      | 13.7                          | 21.9                    |                 |             |  |  |  |  |
|                      |      |                |                |                | 44     | Male                      | 54       | 70                            | 172                     |                 |             |  |  |  |  |
|                      |      |                |                |                |        |                           |          |                               |                         |                 |             |  |  |  |  |
|                      |      |                |                |                |        |                           |          |                               |                         |                 |             |  |  |  |  |



| Recommended posology |      |             |             |             |        |                            |          |                         |                         |                           |          |                        |      |      |
|----------------------|------|-------------|-------------|-------------|--------|----------------------------|----------|-------------------------|-------------------------|---------------------------|----------|------------------------|------|------|
| #ID                  | Sex  | Age (years) | Weight (kg) | Height (cm) | Date   | Dose (mg)                  | Interval | C <sub>min</sub> (mg/L) | C <sub>max</sub> (mg/L) | [Cr] (mg/dL)              | CL (L/h) |                        |      |      |
|                      |      |             |             |             | Day 6  | 800                        | 8 h      | 5.4                     | ---                     | 0.47                      | 10.67    |                        |      |      |
|                      |      |             |             |             | Day 7  |                            |          |                         |                         | 0.41                      | 12.24    |                        |      |      |
|                      |      |             |             |             | Day 8  |                            |          |                         |                         | 0.49                      | 10.24    |                        |      |      |
|                      |      |             |             |             | Day 9  | 700                        | 8 h      | 21.5 <sup>a</sup>       | ---                     | 0.61                      | 8.22     |                        |      |      |
|                      |      |             |             |             | Day 10 |                            |          |                         |                         | 0.53                      | 9.47     |                        |      |      |
|                      |      |             |             |             | Day 11 |                            |          |                         |                         | 9.5                       | 14.2     |                        |      |      |
|                      |      |             |             |             | Day 12 |                            |          |                         |                         | 0.47                      | 10.67    |                        |      |      |
|                      |      |             |             |             | Day 14 |                            |          |                         |                         | 0.37                      | 13.56    |                        |      |      |
|                      |      |             |             |             | Day 15 |                            |          |                         |                         | 14.7                      | 0.45     | 11.15                  |      |      |
| 45                   | Male | 61          | 90          | 175         | Day 1  | 1000                       | 12 h     |                         |                         |                           |          |                        |      |      |
|                      |      |             |             |             | Day 3  |                            |          |                         |                         |                           |          | 1.01                   | 5.87 |      |
|                      |      |             |             |             | Day 4  | Suspend administration     | 14.9     |                         |                         |                           |          | 30.2                   | 0.93 | 6.37 |
|                      |      |             |             |             | Day 7  |                            |          |                         |                         |                           |          |                        | 0.81 | 7.31 |
| 46                   | Fem  | 70          | 61          | 158         | Day 1  | 1000                       | 12 h     |                         |                         | 0.77                      | 3.93     |                        |      |      |
|                      |      |             |             |             | Day 3  |                            |          |                         |                         | 0.74                      | 4.09     |                        |      |      |
|                      |      |             |             |             | Day 6  | 700                        | 12 h     |                         |                         | 0.76                      | 3.98     |                        |      |      |
| 47                   | Male | 79          | 60          | 150         | Day 1  |                            |          |                         |                         | 1.98                      | 1.54     |                        |      |      |
|                      |      |             |             |             | Day 3  |                            |          |                         |                         | 1.98                      | 1.54     |                        |      |      |
|                      |      |             |             |             | Day 4  | 1000                       | 24 h     |                         |                         |                           |          |                        |      |      |
|                      |      |             |             |             | Day 8  | Suspend administration     |          |                         |                         | 2.08                      | 1.47     |                        |      |      |
| 48                   | Fem  | 90          | 45          | 160         | Day 1  |                            |          |                         |                         | 1.14                      | 1.40     |                        |      |      |
|                      |      |             |             |             | Day 4  |                            |          |                         |                         | 700                       | 12 h     | 1.19                   | 1.34 |      |
|                      |      |             |             |             | Day 7  | 500                        | 12 h     |                         |                         | 1.11                      | 1.44     |                        |      |      |
|                      |      |             |             |             | Day 10 | 500                        | 12 h     |                         |                         | 0.97                      | 1.64     |                        |      |      |
|                      |      |             |             |             | Day 16 | Susp 2 doses > 800 mg q24h |          |                         |                         | 1.19                      | 1.34     |                        |      |      |
|                      |      |             |             |             | Day 18 | 500                        | 24 h     |                         |                         | 1.38                      | 1.15     |                        |      |      |
|                      |      |             |             |             | Day 21 |                            |          |                         |                         | 1.49                      | 1.07     |                        |      |      |
| 49                   | Fem  | 85          | 80          | 163         | Day 1  | 500                        | 12 h     |                         |                         |                           |          |                        |      |      |
|                      |      |             |             |             | Day 2  |                            |          |                         |                         | 1.20                      | 2.60     |                        |      |      |
|                      |      |             |             |             | Day 3  | Susp 2 doses > 650 mg q24h |          |                         |                         | 0.83                      | 3.76     |                        |      |      |
|                      |      |             |             |             | Day 4  | 650                        | 24 h     |                         |                         | 16.8                      | 25.8     |                        |      |      |
| 51                   | Fem  | 63          | 70          | 165         | Day 1  | 1000                       | 12 h     |                         |                         | 0.54                      | 7.07     |                        |      |      |
|                      |      |             |             |             | Day 2  |                            |          |                         |                         |                           |          |                        |      |      |
|                      |      |             |             |             | Day 3  |                            |          |                         |                         | 0.93                      | 4.11     |                        |      |      |
|                      |      |             |             |             | Day 4  | Susp 1 dose > 650 mg q8h   |          |                         |                         | 0.86                      | 4.44     |                        |      |      |
| 52                   | Male | 71          | 60          | 165         | Day 1  | 1000                       | 12 h     |                         |                         | 1.36                      | 2.54     |                        |      |      |
|                      |      |             |             |             | Day 3  |                            |          |                         |                         | 1.04                      | 3.32     |                        |      |      |
|                      |      |             |             |             | Day 5  | Susp 1 dose > 600 mg q12h  |          |                         |                         | 0.89                      | 3.88     |                        |      |      |
| 53                   | Male | 59          | 70          | 180         | Day 1  | 1000                       | 12 h     |                         |                         |                           |          |                        |      |      |
|                      |      |             |             |             | Day 4  |                            |          |                         |                         | Susp 1 dose > 500 mg q12h | 32.2     | 44.5                   |      |      |
|                      |      |             |             |             | Day 5  |                            |          |                         |                         | 1.22                      | 3.87     |                        |      |      |
|                      |      |             |             |             | Day 8  | 850                        | 6 h      |                         |                         | 17.9                      | 22.4     |                        |      |      |
|                      |      |             |             |             | Day 9  |                            |          |                         |                         | 1.17                      | 4.04     |                        |      |      |
|                      |      |             |             |             | Day 15 |                            |          |                         |                         | 1000                      | 12 h     |                        |      |      |
|                      |      |             |             |             | Day 18 |                            |          |                         |                         |                           |          | 1.11                   | 4.26 |      |
|                      |      |             |             |             | Day 20 |                            |          |                         |                         |                           |          | 1.06                   | 4.46 |      |
|                      |      |             |             |             | Day 22 |                            |          |                         |                         |                           |          | Suspend administration |      |      |

| Recommended posology |      |             |             |             |        |                             |          |                         |                         |              |          |
|----------------------|------|-------------|-------------|-------------|--------|-----------------------------|----------|-------------------------|-------------------------|--------------|----------|
| #ID                  | Sex  | Age (years) | Weight (kg) | Height (cm) | Date   | Dose (mg)                   | Interval | C <sub>min</sub> (mg/L) | C <sub>max</sub> (mg/L) | [Cr] (mg/dL) | CL (L/h) |
| 54                   | Male | 23          | 60          | 163         | Day 25 |                             |          | 27.2                    | ---                     |              |          |
|                      |      |             |             |             | Day 1  | 1000                        | 12 h     |                         |                         |              |          |
|                      |      |             |             |             | Day 3  | 850                         | 6 h      | 5.1                     | ---                     | 0.88         | 6.65     |
|                      |      |             |             |             | Day 6  | 850                         | 6 h      | 12.0                    | ---                     | 1.02         | 5.74     |
|                      |      |             |             |             | Day 10 |                             |          |                         |                         | 1.00         | 5.85     |
|                      |      |             |             |             | Day 13 | 900                         | 6 h      | 10.2                    | ---                     | 0.96         | 6.09     |
|                      |      |             |             |             | Day 17 | 900                         | 6 h      | 17.0                    | ---                     | 0.98         | 5.97     |
|                      |      |             |             |             | Day 20 | 900                         | 6 h      | 9.6 <sup>a</sup>        | ---                     | 0.94         | 6.22     |
| 55                   | Male | 78          | 70          | 172         | Day 1  | 1000                        | 12 h     |                         |                         |              |          |
|                      |      |             |             |             | Day 7  |                             |          | 21.0                    | 28.0                    | 0.83         | 4.36     |
|                      |      |             |             |             | Day 8  | 750                         | 12 h     |                         |                         | 0.94         | 3.85     |
|                      |      |             |             |             | Day 9  |                             |          | 22.1                    | ---                     | 0.82         | 4.41     |
|                      |      |             |             |             | Day 10 |                             |          |                         |                         | 0.86         | 4.21     |
|                      |      |             |             |             | Day 11 |                             |          |                         |                         | 0.82         | 4.41     |
|                      |      |             |             |             | Day 12 |                             |          | 16.9                    | ---                     | 0.93         | 3.89     |
|                      |      |             |             |             | Day 15 |                             |          | 16.9                    | 25.9                    |              |          |
|                      |      |             |             |             | Day 27 | 1000                        | 12 h     |                         |                         |              |          |
|                      |      |             |             |             | Day 34 |                             |          | 25.0                    | 34.7                    |              |          |
|                      |      |             |             |             | Day 35 |                             |          | 18.5                    | 29.4                    |              |          |
|                      |      |             |             |             | Day 40 | Suspend administration      |          | 26.2                    | 37.6                    |              |          |
| 56                   | Male | 53          | 70          | 180         | Day 42 |                             |          |                         | (occas) 11.4            | 0.86         | 4.21     |
|                      |      |             |             |             | Day 1  |                             |          |                         |                         | 0.35         | 14.50    |
|                      |      |             |             |             | Day 5  | 1000                        | 12 h     |                         |                         | 0.27         | 18.80    |
|                      |      |             |             |             | Day 11 |                             |          | 5.3                     | 12.8                    | 0.38         | 13.36    |
|                      |      |             |             |             | Day 14 | 850                         | 8 h      | 6.7                     | 15.0                    | 0.30         | 16.92    |
|                      |      |             |             |             | Day 18 | 950                         | 8 h      | 14.8                    | 15.4                    |              |          |
|                      |      |             |             |             | Day 20 | 800                         | 6 h      | 12.4                    | 19.8                    | 0.32         | 15.86    |
| 57                   | Male | 41          | 75          | 175         | Day 1  | 1000                        | 12 h     |                         |                         |              |          |
|                      |      |             |             |             | Day 3  | 900                         | 12 h     | 16.7                    | 25.2                    | 1.55         | 3.99     |
|                      |      |             |             |             | Day 8  | Susp 2 doses > 600 mg q12h  |          | 24.9                    | 33.8                    | 1.44         | 4.30     |
|                      |      |             |             |             | Day 11 | 550                         | 12 h     | 17.8                    | 23.1                    | 1.68         | 3.68     |
|                      |      |             |             |             | Day 14 | 600                         | 12 h     | 16.1                    | 21.9                    | 1.20         | 5.16     |
|                      |      |             |             |             | Day 18 | 650                         | 12 h     | 14.4                    | 28.6                    | 1.01         | 6.13     |
|                      |      |             |             |             | Day 22 | 650                         | 12 h     | 16.7                    | 26.4                    | 1.02         | 6.07     |
|                      |      |             |             |             | Day 25 | 650                         | 12 h     | 16.0                    | 44.3 <sup>a</sup>       | 1.02         | 6.07     |
| 58                   | Male | 81          | 95          | 170         | Day 1  | 1000                        | 12 h     |                         |                         |              |          |
|                      |      |             |             |             | Day 2  | 800                         | 12 h     | 8.4                     | ---                     | 1.34         | 3.49     |
|                      |      |             |             |             | Day 4  | 600                         | 12 h     | 25.7                    | 34.0                    |              |          |
|                      |      |             |             |             | Day 5  | Susp 3 doses > 1000 mg q24h |          | 27.1                    | 31.7                    | 1.39         | 3.36     |
|                      |      |             |             |             | Day 6  |                             |          |                         |                         | 1.25         | 3.74     |
|                      |      |             |             |             | Day 8  | 1000                        | 24 h     | 16.3                    | ---                     | 1.19         | 3.93     |
|                      |      |             |             |             | Day 11 |                             |          | 19.0                    | ---                     |              |          |
|                      |      |             |             |             | Day 12 |                             |          |                         |                         | 1.11         | 4.21     |
|                      |      |             |             |             | Day 15 |                             |          | 23.3                    | 42.6                    | 1.17         | 3.99     |
|                      |      |             |             |             | Day 16 | Suspend administration      |          | 25.8                    |                         | 1.28         | 3.65     |
| 59                   | Fem  | 52          | 68          | 164         | Day 1  | 1000                        | 12 h     |                         |                         |              |          |
|                      |      |             |             |             | Day 6  | 700                         | 8 h      | 12.7                    | ---                     | 0.70         | 6.06     |

| Recommended posology |      |             |             |             |        |                                         |          |                         |                         |              |          |
|----------------------|------|-------------|-------------|-------------|--------|-----------------------------------------|----------|-------------------------|-------------------------|--------------|----------|
| #ID                  | Sex  | Age (years) | Weight (kg) | Height (cm) | Date   | Dose (mg)                               | Interval | C <sub>min</sub> (mg/L) | C <sub>max</sub> (mg/L) | [Cr] (mg/dL) | CL (L/h) |
| 60                   | Male | 54          | 70          | 165         | Day 1  | 1000                                    | 12 h     |                         |                         |              |          |
|                      |      |             |             |             | Day 6  |                                         |          | 17.6                    | ---                     |              |          |
|                      |      |             |             |             | Day 7  |                                         |          |                         |                         | 0.96         | 5.23     |
|                      |      |             |             |             | Day 8  |                                         |          |                         |                         | 1.08         | 4.65     |
|                      |      |             |             |             | Day 9  |                                         |          | 23.2                    | ---                     | 0.89         | 5.64     |
|                      |      |             |             |             | Day 10 | 600                                     | 12 h     | 18.0                    | ---                     | 0.82         | 6.12     |
|                      |      |             |             |             | Day 17 | Susp 1 dose > 750 mg q24h               |          | calc 24-26              | 32.5                    |              |          |
|                      |      |             |             |             | Day 18 |                                         |          |                         |                         | 1.25         | 4.01     |
|                      |      |             |             |             | Day 19 |                                         |          |                         |                         | 0.97         | 5.17     |
|                      |      |             |             |             | Day 20 | Susp 1 dose > 1000 mg q24h <sup>b</sup> |          | 13.3                    | 23.2                    | 0.93         | 5.39     |
|                      |      |             |             |             | Day 23 | 450                                     | 12 h     | 11.9                    | ---                     |              |          |
|                      |      |             |             |             | Day 24 |                                         |          |                         |                         | 0.63         | 7.96     |
|                      |      |             |             |             | Day 25 |                                         |          |                         |                         | 0.64         | 7.84     |
|                      |      |             |             |             | Day 26 |                                         |          |                         |                         | 0.65         | 7.72     |
|                      |      |             |             |             | Day 27 |                                         |          |                         |                         | 0.56         | 8.96     |
| 61                   | Male | 62          | 121         | 176         | Day 1  | 1000                                    | 12 h     |                         |                         |              |          |
|                      |      |             |             |             | Day 4  | 1000                                    | 8 h      | 6.5                     | 14.9                    | 0.76         | 10.35    |
|                      |      |             |             |             | Day 7  | Susp 1 dose > 800 mg q6h                |          | 12.0                    | 20.0                    | 0.82         | 9.59     |
|                      |      |             |             |             | Day 11 |                                         |          |                         |                         | 0.87         | 9.04     |
|                      |      |             |             |             | Day 12 | 1000                                    | 12 h     | 16.0                    | 19.7                    |              |          |
|                      |      |             |             |             | Day 19 | 750                                     | 6 h      | 8.1                     | 14.5                    | 0.77         | 10.21    |
|                      |      |             |             |             | Day 21 | 800                                     | 6 h      | 12.3                    | 14.4 <sup>a</sup>       | 0.79         | 9.96     |
|                      |      |             |             |             | Day 25 | 900                                     | 6 h      | 12.2                    | 15.1                    | 0.73         | 10.77    |
|                      |      |             |             |             | Day 29 |                                         |          | 14.9                    | 20.1                    | 0.82         | 9.59     |
|                      |      |             |             |             | Day 31 |                                         |          |                         |                         | 0.87         | 9.04     |
|                      |      |             |             |             | Day 33 | 900                                     | 6 h      | 16.9                    | 20.5                    | 0.77         | 10.21    |
|                      |      |             |             |             | Day 36 | Susp 2 doses > 800 mg q6h               |          | 11.6                    | 16.9                    | 0.84         | 9.36     |
|                      |      |             |             |             | Day 39 | 900                                     | 6 h      | 17.4                    | 21.2                    | 0.80         | 9.83     |
|                      |      |             |             |             | 64     | Male                                    | 62       | 65                      | 170                     | Day 1        | 500      |
| Day 10               |      |             |             |             |        |                                         |          |                         |                         | 1.38         | 3.06     |
| Day 15               | 600  | 6 h         | 13.4        | 17.8        |        |                                         |          |                         |                         | 0.94         | 4.49     |
| 65                   | Fem  | 80          | 60          | 165         | Day 1  | 1000                                    | 12 h     |                         |                         | 0.62         | 4.11     |
|                      |      |             |             |             | Day 3  | 600                                     | 6 h      | 7.2                     | 17.4                    | 0.40         | 6.38     |
|                      |      |             |             |             | Day 6  | 600                                     | 6 h      | 13.2                    | 16.7                    | 0.34         | 7.50     |
|                      |      |             |             |             | Day 8  | 500                                     | 6 h      | 16.8                    | 20.8                    | 0.32         | 7.97     |
| 66                   | Fem  | 86          | 50          | 155         | Day 1  | 1000                                    | 12 h     | 19.2                    | 35.5                    | 0.65         | 2.94     |
| 67                   | Fem  | 20          | 50          | 157         | Day 1  | 1000                                    | 12 h     | 4.5                     | 14.9                    | 0.43         | 9.88     |
| 68                   | Male | 54          | 58          | 160         | Day 1  | 1000                                    | 12 h     | 15.0                    | 34.6                    | 0.63         | 6.60     |
| 69                   | Fem  | 46          | 70          | 156         | Day 1  | 1000                                    | 12 h     | 6.6                     | 19.2                    | 0.38         | 12.27    |
| 70                   | Fem  | 78          | 47          | 160         | Day 1  | 650                                     | 12 h     | 14.9                    | 29.0                    | 0.74         | 2.79     |
| 71                   | Fem  | 63          | 70          | 170         | Day 1  | 1000                                    | 12 h     | 9.0                     | 19.2                    | 0.55         | 6.94     |
| 72                   | Male | 83          | 70          | 170         | Day 1  | 1000                                    | 12 h     | 15.1                    | 26.9                    | 0.97         | 3.43     |
| 73                   | Male | 75          | 57          | 170         | Day 1  | 1000                                    | 12 h     | 24.9                    | 41.0                    | 1.03         | 3.00     |
| 74                   | Male | 83          | 65          | 170         | Day 1  | 1000                                    | 12 h     | 22.3                    | 36.8                    | 1.28         | 2.41     |
| 75                   | Fem  | 19          | 60          | 170         | Day 1  | 1000                                    | 8 h      | 18.0                    | 43.1                    | 1.87         | 2.75     |

<sup>a</sup> probable irregularity in the analytical determination of antibiotic concentration.

<sup>b</sup> previous posology was followed.

---

Susp X dose: X number of scheduled doses were suspended and recommended posology for when antibiotic administrations were resumed is presented.

#### Reference

Cockcroft, D.W.; Gault, M.H. Prediction of creatinine clearance from serum creatinine. *Nephron* **1976**, *16*, 31–41.
